# Supplementary material
Source: PubMed Central journal article supplement (PMC5998332)
Supplement: NIHMS968012-supplement-supplement_1.pdf [file NIHMS968012-supplement-supplement_1.pdf]

Cell Host & Microbe, Volume 23

## Supplemental Information

### **Immunization with AgTRIO, a Protein in *Anopheles* Saliva, Contributes to Protection against *Plasmodium* Infection in Mice**

**Srdjan M. Dragovic, Tolulope A. Agunbiade, Marianna Freudzon, Jing Yang, Andrew K. Hastings, Tyler R. Schleicher, Xia Zhou, Sam Craft, Yu-Min Chuang, Floricel Gonzalez, Youquan Li, Gabriela Hrebikova, Abhai Tripathi, Godfree Mlambo, Lionel Almeras, Alexander Ploss, George Dimopoulos, and Erol Fikrig**

## SUPPLEMENTARY FIGURE LEGENDS

**Figure S1. Purified AgTRIO IgG reduces parasitemia in mice in a dose-dependent manner, Related to Figure 3 and Table S2.** (A-F) Mice were administered a high dose of AgTRIO IgG (500  $\mu$ g, AgTRIO IgG), a low dose of AgTRIO IgG (80  $\mu$ g, Low TRIO IgG), or OVA IgG (500  $\mu$ g). Mice were then exposed to bites from 3 *Plasmodium berghei*-infected mosquitoes. Blood was collected on day 4 (A and D), 5 (B and E), and 8 (C and F). Blood was used for RNA isolation and subsequent RT-qPCR analysis using *P. berghei* 18S rRNA with murine  $\beta$ 2-microglobulin (mouse  $\beta$ 2m) serving as a control (A-C) For the PCR studies, as an additional control, naïve mice were not administered IgG or exposed to *P. berghei*-infected mosquitoes (A-C). Flow cytometry analysis (D-F) The presence of *P. berghei* was determined based on the GFP signal in the blood sample. Results represent 3 combined independent experiments. Each data point represents one mouse. Error bars represent mean  $\pm$  SEM. Mean values were considered significantly different using the non-parametric Mann-Whitney test when  $p < 0.05$ . Not significant (ns).

**Figure S2. Amino acid sequence analysis of SG1 family members, as well as the D7-family member, D7r1, Related to the STAR Methods section, and Figures S3 and S4.** 1. AgTRIO, 2. SG1L3, 3. SG1b, 4. D7r1. The signal peptide sequences are marked in red, and were determined using the SignalP 4.1 server.

**Figure S3. AgTRIO, SG1L3, SG1b and D7r1 antisera recognize salivary proteins, Related to Figure 3, and Figures S2 and S4, and Table S2.** (A-D). Rabbit antisera to AgTRIO (A), SG1L3 (B), SG1b (C), or D7r1 (D) recognize their respective proteins in salivary glands (SG). There is no reactivity with midgut proteins (MG). (E-G) Rabbit antisera to SG1L3 (E), SG1b (F) and D7r1 (G) identify their associated proteins in mosquito saliva.

**Figure S4. SG1L3, SG1b and D7r1 antisera are not protective against mosquito-borne *Plasmodium* challenge, Related to Figure 3 and Figures S2 and S3, and**

**Table S2.** (A-B) Mice were given SG1L3 (A), or SG1b (B) antisera and then challenged with *Plasmodium berghei*-infected mosquitoes. Livers were collected at 40 hours and RNA isolated. RT-qPCR was performed to determine levels of *P. berghei* RNA using *18S rRNA* and mouse *actin* (control). Each result depicts 3 independent experiments. (C-E) SG1L3 (C), SG1b (D) and D7r1 (E) antisera were administered to mice prior to exposure to *P. berghei*-infected mosquito. (C-D) On day 5, blood was collected from mice to isolate RNA and perform RT-qPCR. *P. berghei* levels were determined using *18S rRNA*, while mouse *actin* served as control. Results represent 2 independent parasitemia experiments. (E) Flow cytometry analysis. The presence of *P. berghei* was determined based on the GFP signal in the blood sample on day 5. Each data point represents one mouse. Error bars represent mean  $\pm$  SEM. Mean values were considered significantly different using the non-parametric Mann-Whitney test when  $p < 0.05$ . Not significant (ns).

**Figure S5. Antibodies raised against *Anopheles gambiae* TRIO interact with *Anopheles stephensi* TRIO, Related to Figure 3.** (A-B) Salivary glands and midguts were isolated from female, clean blood-fed *A. gambiae* and *A. stephensi* mosquitoes. Rabbit serum to AgTRIO was used to probe against AgTRIO and AsTRIO in salivary glands (A). Midgut served as negative control (B). Actin antibody was used to detect actin. Actin levels were normalized for the loading control.

**Figure S6. AgTRIO antiserum affects immune cell populations in the skin of mice fed upon by *Plasmodium berghei*-infected *Anopheles gambiae*, Related to Figure 7.** C57Bl/6 mice were passively immunized with AgTRIO or OVA antisera and 4 infected *A. gambiae* mosquitoes were allowed to feed on the ears of each mouse. Both bitten and unbitten (naïve) ears were harvested, enzymatically digested to single cell suspension and the percentage of CD45<sup>+</sup> Ly6G<sup>-</sup> (B, C and D) or CD45<sup>+</sup> (A) cells of each population of macrophages (B), dendritic cells (C), Langerhans cells (D) and neutrophils (A) were analyzed using flow cytometry. Data shown are pooled from 3 independent experiments, with an n=16 for each group. Significance was calculated using a one-way

ANOVA with post-hoc Tukey test for multiple comparisons. Each dot represents one mouse. Results represent 3 combined independent experiments. n.s. not significant.

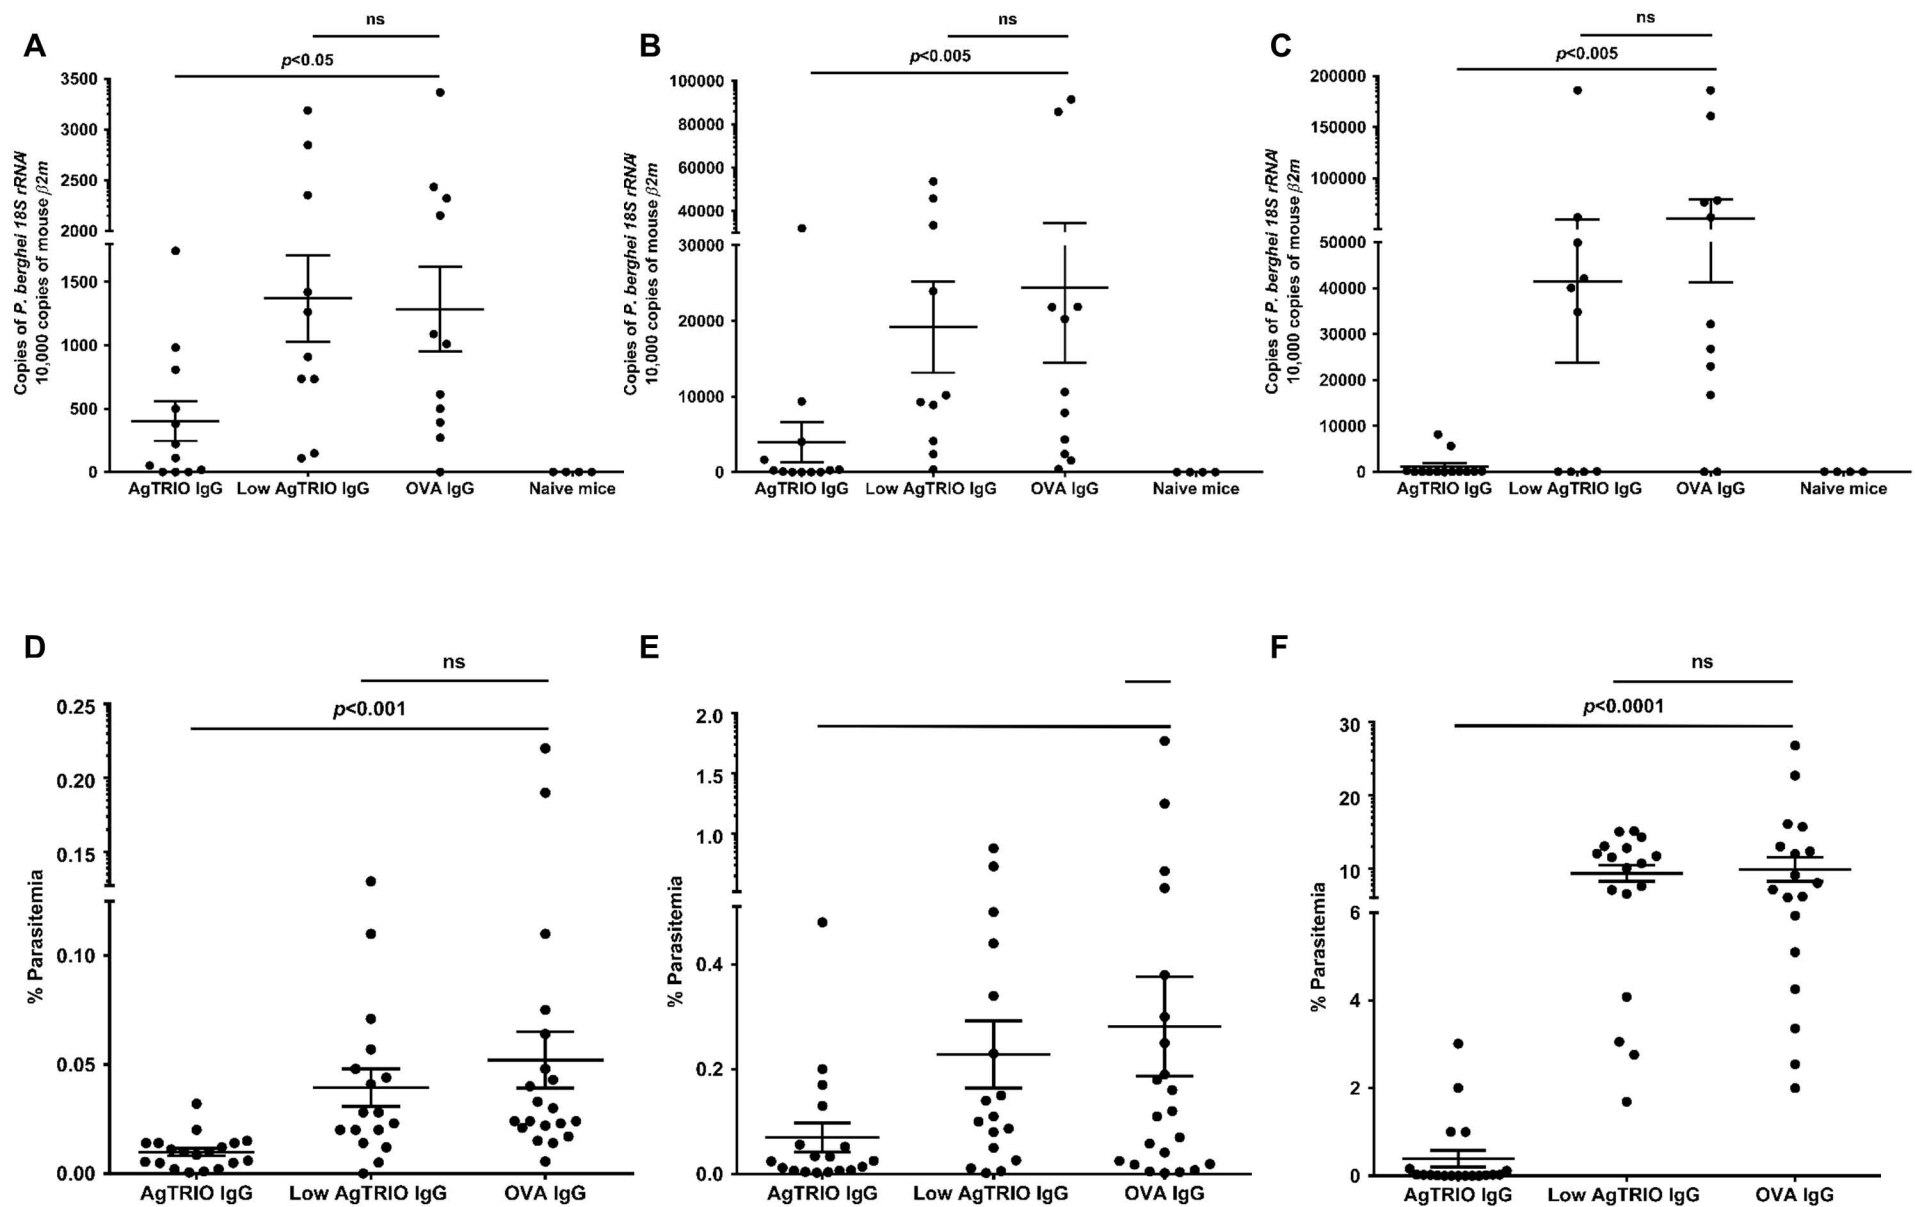

Figure S1. Purified AgTRIO IgG reduces parasitemia in mice in a dose-dependent manner

- 1 AgTRIO (AGAP001374-PA)  
MCRGLSAVLILLVSLSAQLHVVVGEEAPKPEKEICGLKVGRRLLDSVKGWLSVSQQEKCPLNKYCENKIQA  
DQYNLVPLTCIRWRSNLPASPTGSLGGKDVVSKIDAAMS NFKTLFEPMKADLAKLEEEVKRQVLD AWKAL  
EPLQKEVYRSTLASGRIERAVFY SFMEMGDNVKLDNYFQPANVEELLKYAWALPMHKKQRSMYDLIGQLV  
QSSKSPMLQTLH AVELATVVNPELENRENLLNDQVVQLRDNLYKNSFATLVSIARHFPDHFDTLRQRLF  
LPDGSKPGADTL PNIVNFIAQLPSDELRLSSVDLLLQSLTAENGLVQDPEYVYRLS QLAHAMPSLVDV  
AHPDLQQSVDDLMAKFNTPIDGKTLQYFQNI GISPSSSVAT
  
- 2 SG1L3 (AGAP000607-PA)  
MTPLIATLAACAL TLSIVHSRGLPESSDKLEACGQHYGALLKASTTWNEKECNGSTKLAACVVSEHEQAY  
RELKQRCQEADERTAKVNAIYEKLPAYLSEVSARVNVLQVSLQHDLPNLQEMVGEQRHLIEQAWQYGAQ  
LQHELMLTSMESDRVQRALVLHSM LVNASLAEMVKESYQTHGADGRMVVRLK FVRLLPGADERVAVYKQ  
LAELLSNGQDGRFPAVIFSTDVRQLED RYKPDHAQYEGKVVERWLAELQAGTFHEVVEFARDYPEYFAR  
VEEPLYETLKQQWSAEG LDRMVSPNALPVG VQRVRALRALLETLLQH QGEQNNDVYLIRLAHETGRVEA  
TVGQADAAVRQALDDVKKLFEQFKYQRGFPDYEALYKLFKGL
  
- 3 SG1b (AGAP000548-PA)  
MAYRLLVSC LLLLQLVLTQADGGSFLAPSGSNYCP IPEVLEQENGTAPADWSASCTQRRTEDHAKIEQA  
VAVIKDHLEKQAAATKPIRDEL RQFGG TLLPLLNSAQVKTDAAELDEL RMSVLVAAIEAGRIPEAMTQFL  
MLAGWNRWPQIVAQIYQNTRRDRQHIANLLEFIRIVPARDDRVAFYHELK KHMVASKDYESYLGAMFAAD  
AFHVVYEADGKTPLNESDVKALYTTMLDGAGAYFQRALLTG ANRYDLFLLDEHHPQLFDLLFD RIVNVSQ  
ANMRKFNSWQMMGALCRVHRPMSKVLLFRKTANLLLDHF KWEEKENEYYAPMLAGYFEVCLPDIRKDPATA  
GLVTEVQNIFGRYKKGMNYKSISHIIGKNIHAYAG
  
- 4 D7r1 (AGAP008284-PA)  
MFNKLHFV SLLACGLFVIAQANTVKKCEKKMPASLKS QLCEIRKYKLLDTPDMDKHMDCVMKALDFVRPD  
GTGDYHKLKPLNAIEKDRKHDFNLEKCGGQTQHLPV GKRANAYYKCLVESTSGEAFKKVFDTVELVKAK  
KLPALSQYSSVVDKMMKIDDKICN

**Figure S2. Amino acid sequence analysis of SG1 family members, as well as the D7-family member, D7r1**

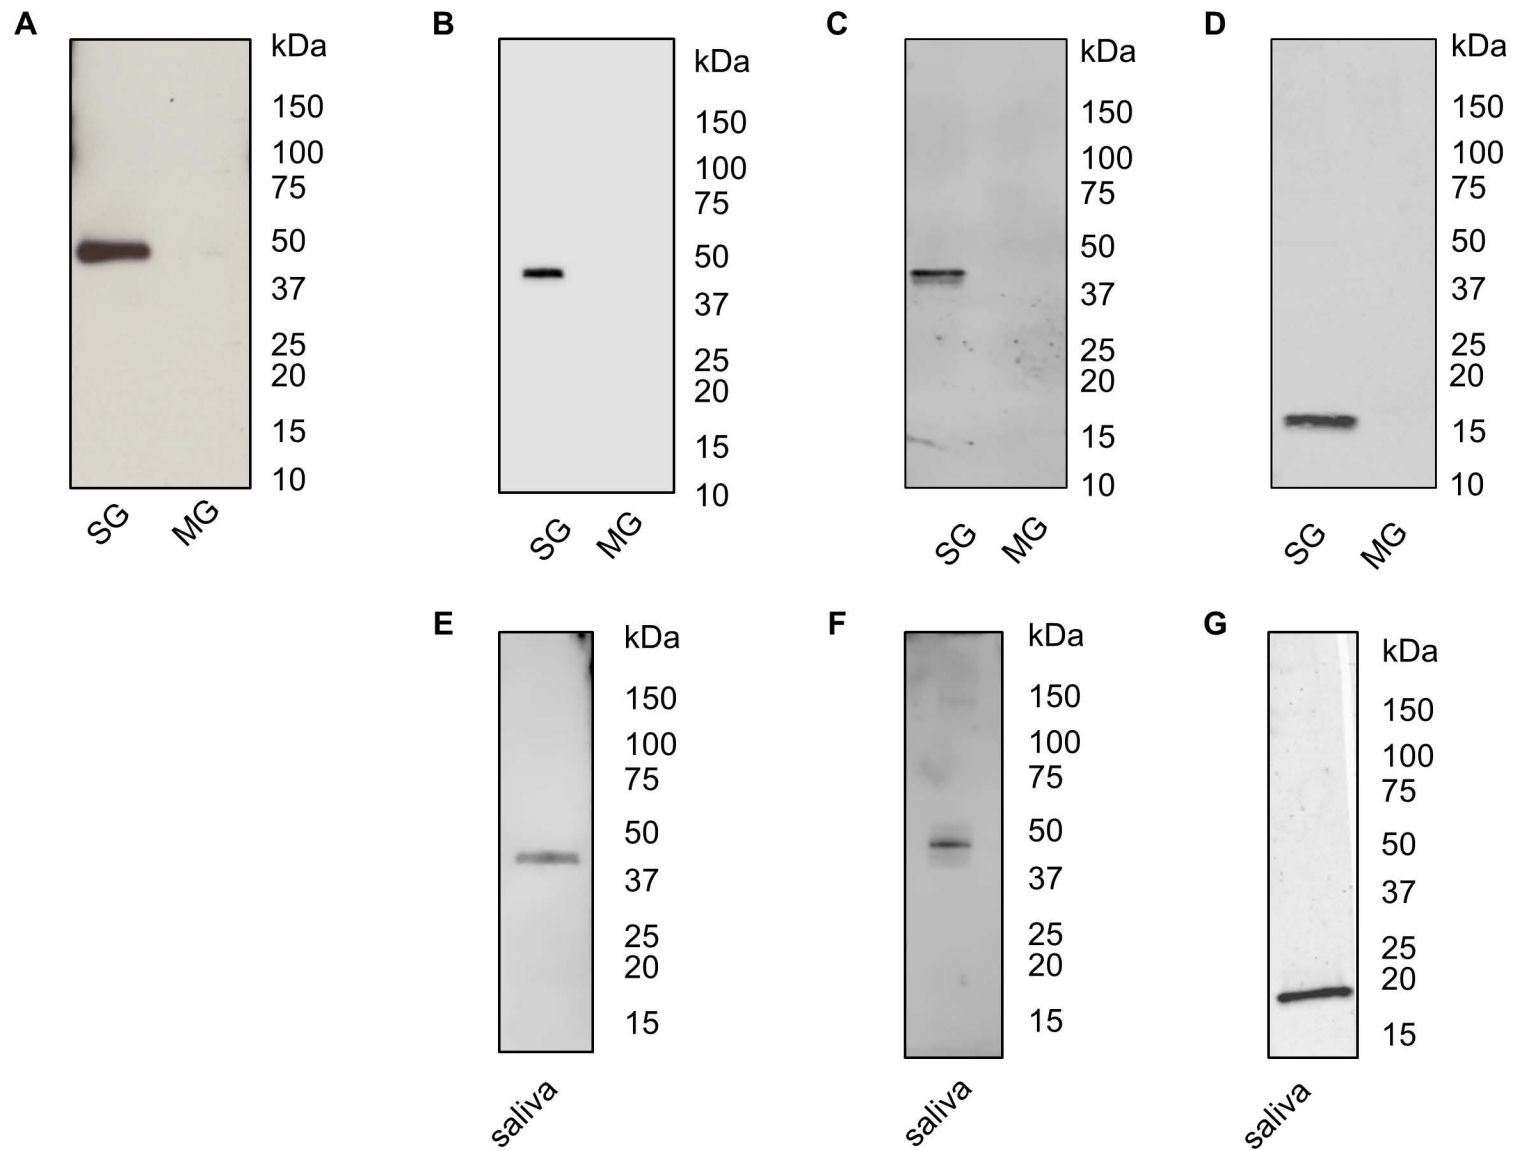

**Figure S3. AgTRIO, SG1L3, SG1b and D7r1 antisera recognize salivary proteins**

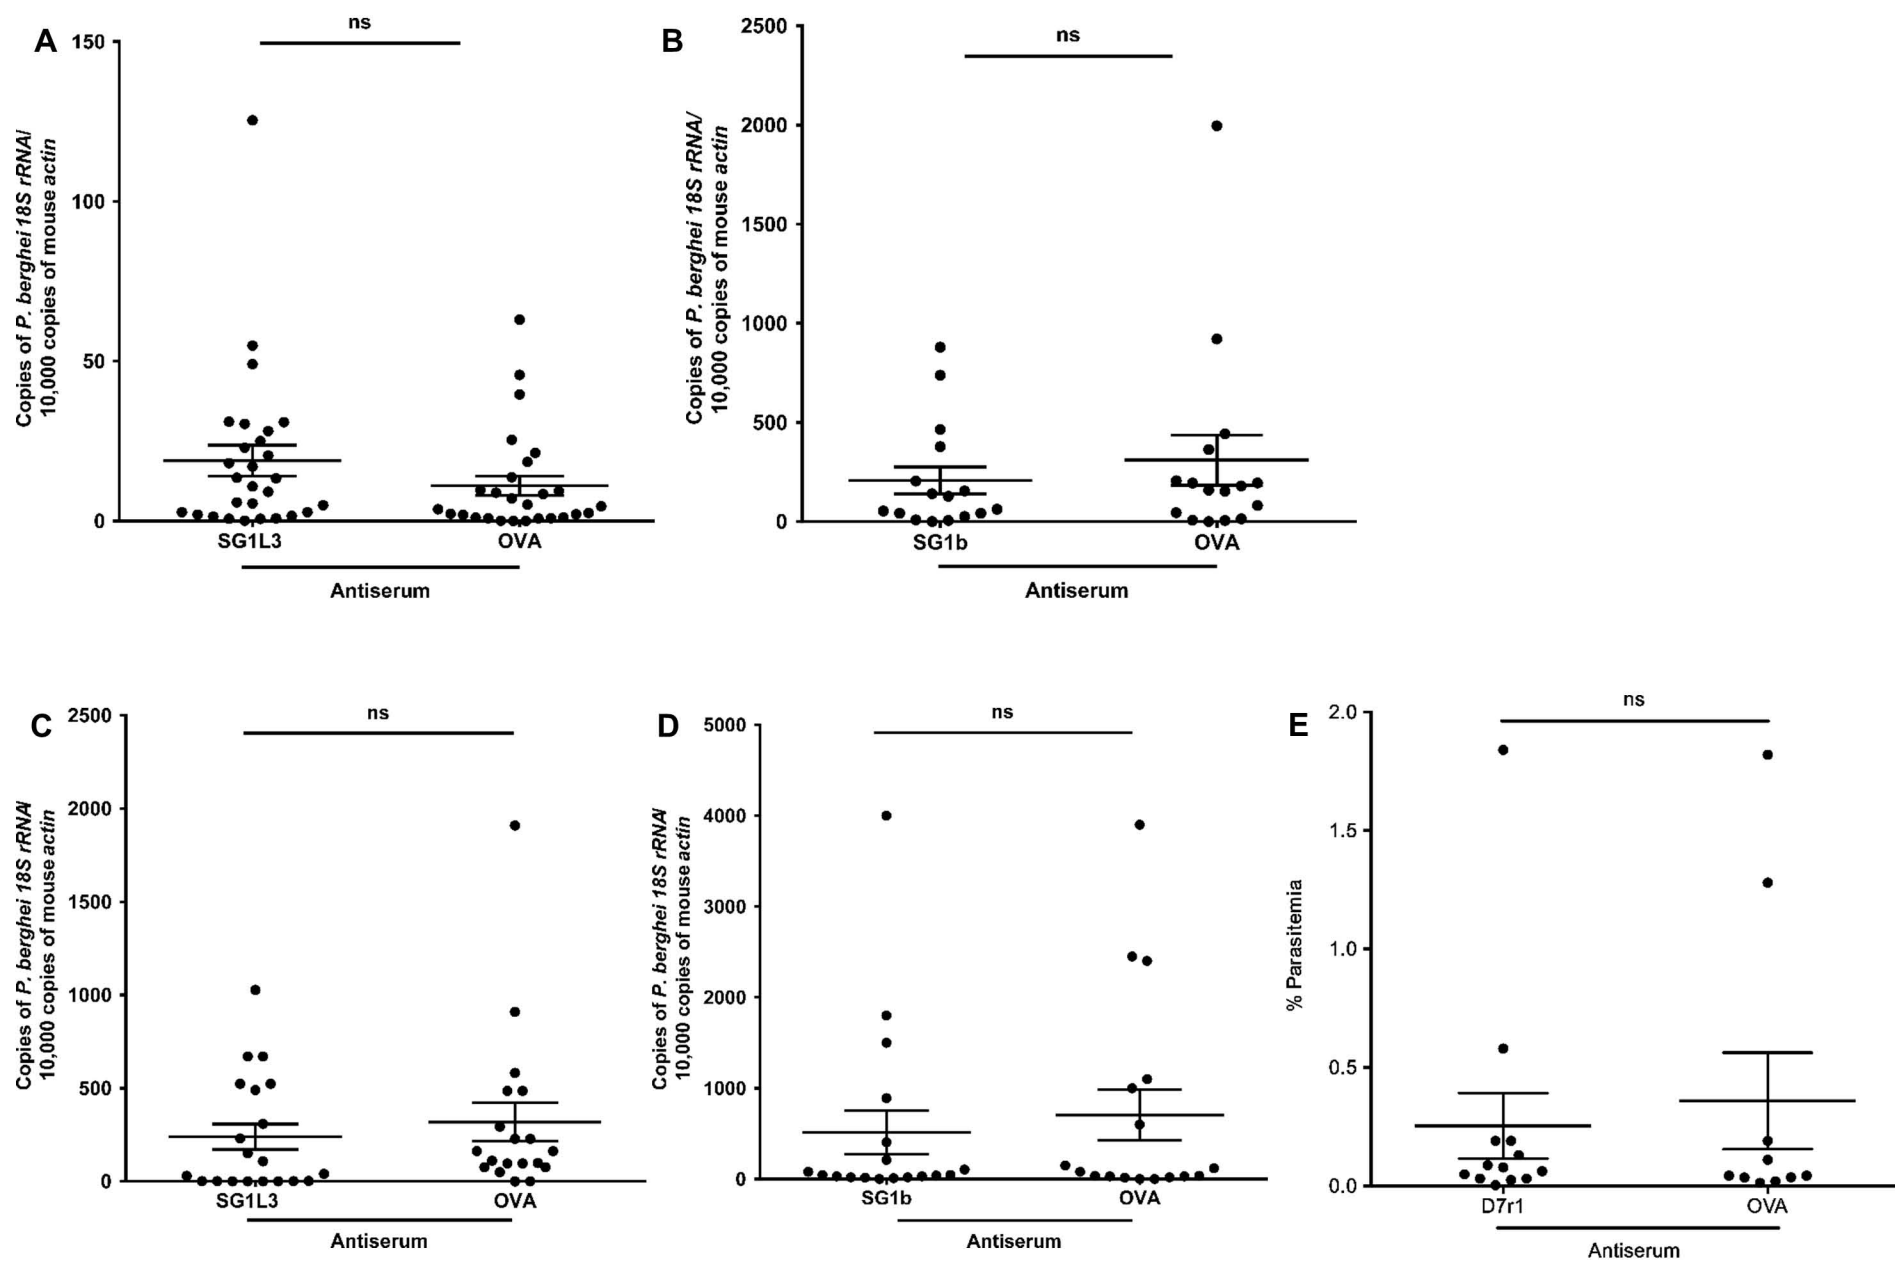

Figure S4. SG1L3, SG1b and D7r1 antisera are not protective against mosquito-borne *Plasmodium* challenge



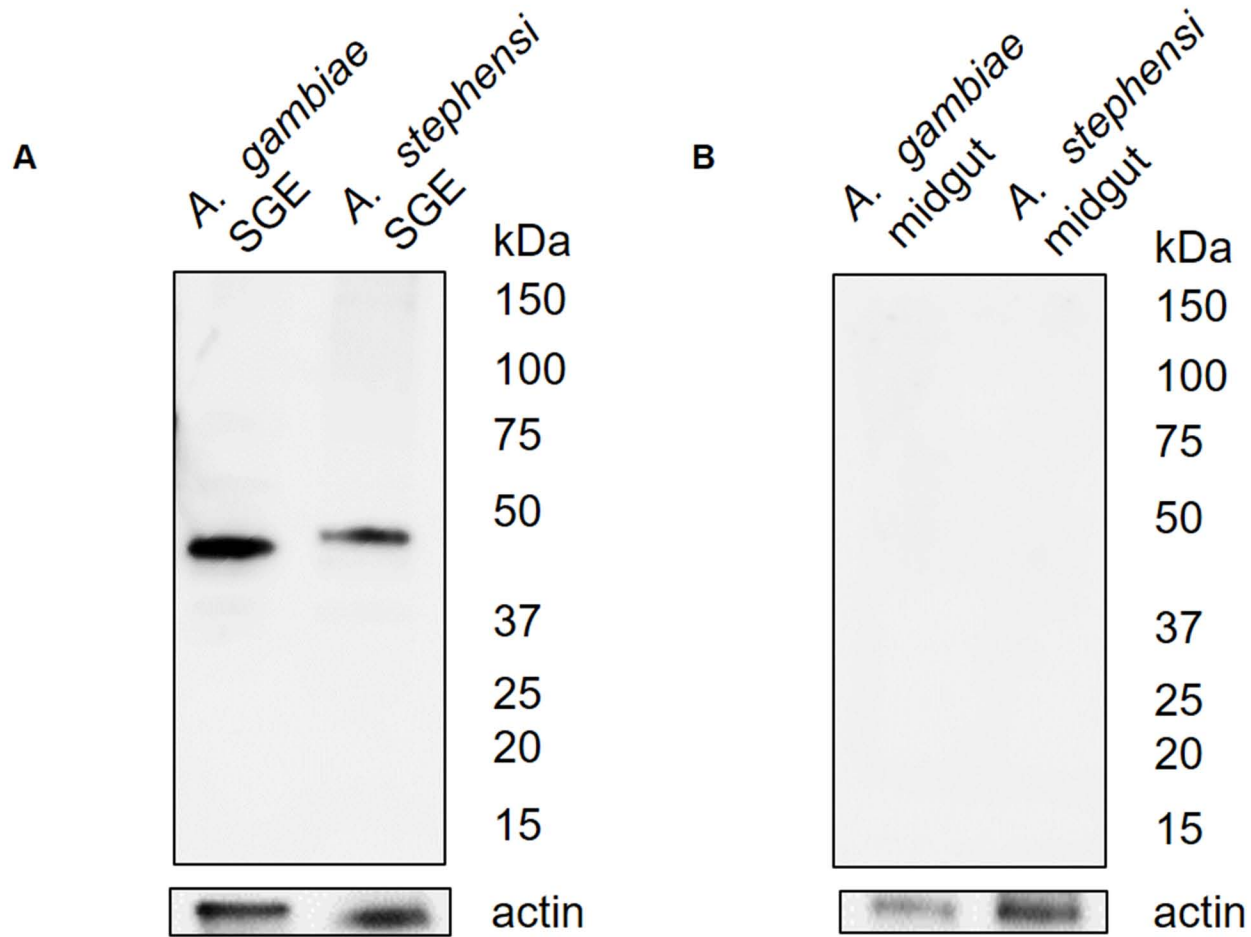

**Figure S5. Antibodies raised against *Anopheles gambiae* TRIO interact with *Anopheles stephensi* TRIO**

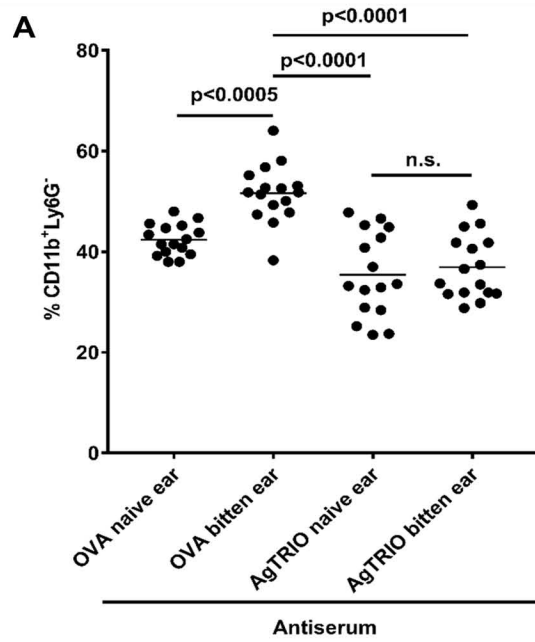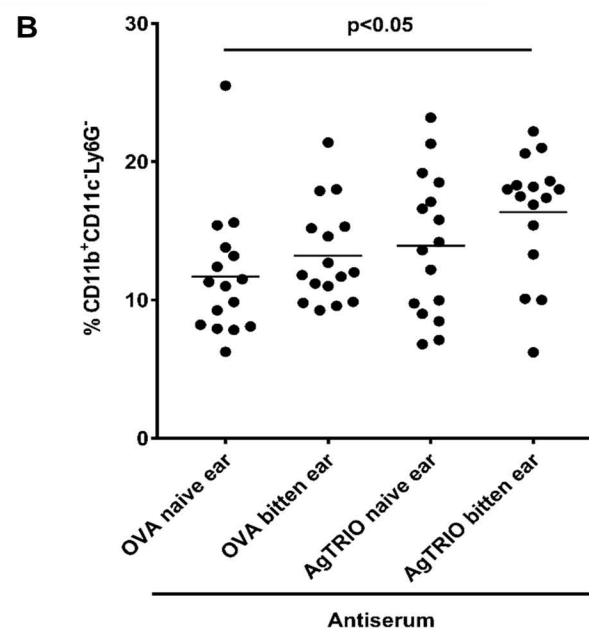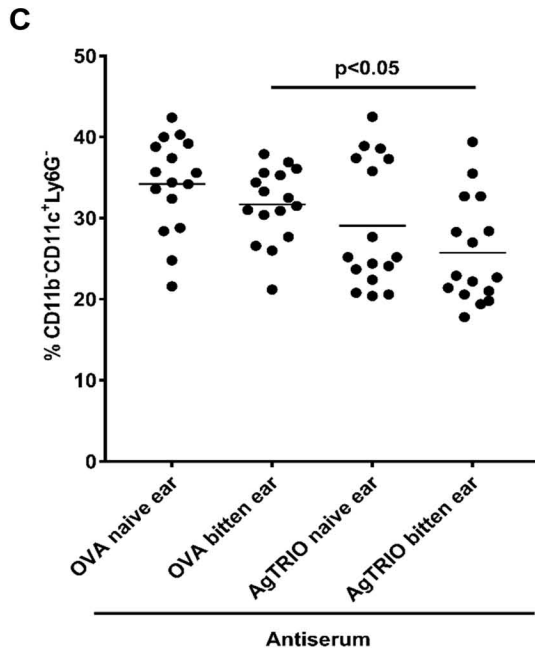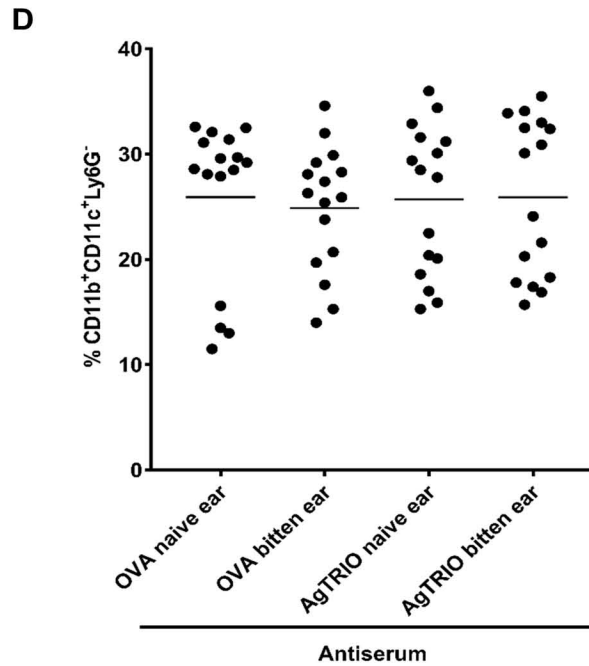

**Figure S6. AgTRIO antiserum affects immune cell populations in the skin of mice fed upon by *Plasmodium berghei*-infected *Anopheles gambiae***

**Table S1. *Anopheles gambiae* antigenic salivary gland proteins identified by probing an *A. gambiae* salivary gland cDNA yeast surface display library with antiserum against *A. gambiae* salivary gland extracts, Related to Figure 1.** Commonly detected proteins with a putative signal sequence are listed below (AGAP001374-AGAP012401), followed by commonly detected proteins lacking a signal sequence.

| <b>Gene</b>       | <b>Protein</b>                                               | <b>Molecular weight (kDa)</b> |
|-------------------|--------------------------------------------------------------|-------------------------------|
| <i>AGAP001374</i> | TRIO<br>(Arca et al., 2005)                                  | 40                            |
| <i>AGAP008284</i> | D7r1: D7 short form<br>(Arca et al., 1999)                   | 18                            |
| <i>AGAP008282</i> | D7r2: D7 short form<br>(Arca et al., 1999)                   | 18                            |
| <i>AGAP006504</i> | SG2b: salivary gland<br>protein 2-like 1 (Holt et al., 2002) | 17                            |
| <i>AGAP000610</i> | Saglin<br>(Ghosh et al., 2009)                               | 49                            |
| <i>AGAP011026</i> | 5' nucleotidase<br>(Arca et al., 1999)                       | 63                            |
| <i>AGAP003251</i> | CLIP-domain serine<br>Protease (Gorman et al., 2000)         | 40                            |

|                   |                                                                 |     |
|-------------------|-----------------------------------------------------------------|-----|
| <i>AGAP007400</i> | Histidine acid phosphatase<br>family member (Holt et al., 2002) | 45  |
| <i>AGAP012401</i> | Maltase-like protein<br>(Zheng et al., 1995)                    | 57  |
| <i>AGAP002378</i> | Adenylosuccinate lyase<br>(Jurecka et al., 2015)                | 54  |
| <i>AGAP010257</i> | 60S ribosomal protein L13a<br>(Wool et al., 1995)               | 22  |
| <i>AGAP004462</i> | 40S ribosomal protein S25<br>(Li and Center, 1992)              | 17  |
| <i>AGAP010815</i> | TEP1: thioester-containing protein 1<br>(Le et al., 2012)       | 132 |
| <i>AGAP006817</i> | FACT complex subunit SPT16<br>(Adams et al., 2000)              | 124 |
| <i>AGAP008816</i> | 20S proteasome subunit alpha 5<br>(Groll et al., 1997)          | 27  |
| <i>AGAP010156</i> | ATP citrate lyase<br>(Elshourbagy et al., 1992)                 | 118 |
| <i>AGAP012090</i> | serine/threonine-protein kinase<br>MRCK (Tan et al., 2008)      | 186 |

*AGAP004164* glutathione S-transferase delta class 1 24  
(Scian et al., 2015)

*AGAP005660* CYP305A4: cytochrome P450 60  
(Danielson, 2002)

*AGAP010816* TEP3: thioester-containing protein 3 151  
(Bou Aoun et al., 2011)

*AGAP012089* nuclear inhibitor of protein 42  
phosphatase 1 (Van Eynde et al., 1995)

---

**Table S2. Oligonucleotide primers used in the experiments, Related to Figures 2, 3, 4,6, S1, S3, and S4.** The purpose of the primers is indicated, followed by the gene that was amplified. Forward primer (F) and Reverse primers (R) are indicated.

---

Analysis of *Plasmodium falciparum* infection of mice

---

*P. falciparum* 18S rRNA

F- CGTCGCTCCTACCGATTGAA  
R- ACCTTGTTACGACTTCTCCTTCC

Human GAPDH

F- CTTGAGGCTGTTGTCATACTTC  
R- GTCCACTGGCGTCTTCAC

---

Gene amplification for insertion into vectors for protein expression in *Escherichia coli*

---

AgTRIO

F- CTGCTAGGATCCGGAAGAAGCTCCCAAACCGGAGAAG  
R- AAGCTAGCGGCCGCGGAGGTAGCGACCGAGGAGGAC

D7r1

F- GGATCC ATGCCAGCCTCACTC  
R- GCGGCCGCGTTGCAAATCTTGTCATCG

SG1L3

F- GATCACGCGGCCGCATGACGCCATTGATCGCAACC  
R- GATCTCTAGACTCAAACCCTTAAACAACCTTGTA

SG1b

F- GATCGGATCCGCTTACCGACTGCTGGTGAGCT  
R- GATCACGCGGCCGCCTACCCAGCATACGCGTGGAT

---

Quality assessment of the salivary gland cDNA library

---

SG1L3

F- GTGATCTTCTCGACCGATGTG  
R- TGTACAGCGCTTCGTAATCC

AgTRIO

F- GGAAATGGGTGACAACGTAAAG  
R- GTGACAGACGGTACACATACTC

Apyrase

F- GATCCGCTCTACAGATCCATTC  
R- GTCAACCGGCCTACATACTTAC

gSG6

F- CTTGCTGTGAGCGTCAGTTA  
R- GTGCTTTGCTGGCCATTTTC

Lysozyme

F- GCCGTAGCCGAAGCTAAA  
R- TTGAACCGTAGCCCGAATC

*D7r1*

F- GACACTCCCGATATGGACAAG  
R- CCATCGTAGGTCCTTCCTTTAG.

---

Analysis of mosquito-borne *Plasmodium berghei* infection

---

*AgTRIO*

F- CGCTTCCCAACATTGTCAAC  
R- TCTCAGCCGTAAGTGATTGC

*Anopheles gambiae actin*

F- GAAGGCTAACCGCGAGAAGATG  
R- CGCCGGAGTCCAGCACGATA

*P. berghei 18S rRNA*

F- TGCCGAACTAAGTGTTGGATG  
R- CGAATACTCGCCCCAGAAC

*Mouse beta-2 microglobulin*

F- CTCACACTGAATTCACCCCC  
R- TCACATGTCTCGATCCCAGT

*Hepatic nuclear factor 4 alpha*

F- TCAAGGATGAAGAGCTTGCC  
R- ACGTGTCTGATGTGATCTGC
